# Supplementary material for: Metagenomic Analysis of the Respiratory Microbiome of a Broiler Flock from Hatching to Processing
Source: PubMed Central journal article supplement (PMC8065701; doi:10.3390/microorganisms9040721), 2021-03-31
Supplement: microorganisms-09-00721-s001.pdf [file microorganisms-09-00721-s001.pdf]

Table S1. Sequencing data generated by DNA-Seq, RNA-Seq and 16S rRNA

| <b>DNA-Seq</b> | <b>Total Reads</b> | <b>After Trimming</b> | <b>% Mapped Host</b> | <b>Mapped to DNA Viral Reads</b> | <b>Mapped to Bacteriophage</b> | <b>Mapped to Fungi</b> |
|----------------|--------------------|-----------------------|----------------------|----------------------------------|--------------------------------|------------------------|
| Week 0         | 46,586,608         | 46,568,465            | 86.43                | 1                                | 68,174                         | 545                    |
| Week1          | 43,940,202         | 43,911,476            | 81.11                | 0                                | 63,256                         | 649                    |
| Week 2         | 33,471,831         | 33,442,860            | 89.8                 | 1                                | 61,974                         | 48                     |
| Week 3         | 45,131,953         | 45,108,639            | 84.81                | 2                                | 68,330                         | 313                    |
| Week 4         | 44,621,969         | 44,600,956            | 90                   | 387                              | 61,412                         | 109                    |
| Week 5         | 38,630,592         | 38,590,484            | 88.99                | 7                                | 51,011                         | 142                    |
| Week 6         | 45,915,721         | 45,900,494            | 89.73                | 4,634                            | 66,310                         | 82                     |
| Week 7         | 41,215,207         | 41,196,338            | 90.18                | 131                              | 64,215                         | 76                     |
| <b>Total</b>   | <b>339,514,083</b> | <b>339,319,712</b>    | <b>701</b>           | <b>5,163</b>                     | <b>504,682</b>                 | <b>1,964</b>           |
| <b>Average</b> | <b>42,439,260</b>  | <b>42,414,964</b>     | <b>88</b>            | <b>645</b>                       | <b>63,085</b>                  | <b>246</b>             |

  

| <b>RNA-Seq</b> | <b>Total Reads</b> | <b>After Trimming</b> | <b>% Mapped Host</b> | <b>Mapped to RNA Viral Reads</b> |
|----------------|--------------------|-----------------------|----------------------|----------------------------------|
| Week 0         | 62375955           | 62351619              | 49.21                | 416                              |
| Week1          | 54,496,930         | 54,477,530            | 44.3                 | 16,569                           |
| Week 2         | 51,426,090         | 51,415,545            | 65.54                | 10,016                           |
| Week 3         | 57,566,851         | 57,551,710            | 28.76                | 977                              |
| Week 4         | 56,334,014         | 56,321,058            | 61.62                | 3,660                            |
| Week 5         | 50,937,821         | 50,926,463            | 57.56                | 4,579                            |
| Week 6         | 53,248,431         | 53,236,536            | 59.08                | 29,476                           |
| Week 7         | 54,173,052         | 54,162,138            | 61.44                | 6,243                            |
| <b>Total</b>   | <b>440,559,144</b> | <b>440,442,599</b>    | <b>428</b>           | <b>71,936</b>                    |
| <b>Average</b> | <b>55,069,893</b>  | <b>55,055,325</b>     | <b>53</b>            | <b>8,992</b>                     |

  

| <b>16S rRNA</b> | <b>Total Reads</b> | <b>OTUs</b> |
|-----------------|--------------------|-------------|
| Week 0          | 8,438              | 47          |
| Week 1          | 7,550              | 79          |
| Week 2          | 6,737              | 76          |
| Week 4          | 9,450              | 63          |
| Week 5          | 10,718             | 50          |
| Week 7          | 7,288              | 38          |
| <b>Total</b>    | <b>50,181</b>      | <b>353</b>  |
| <b>Average</b>  | <b>8,364</b>       | <b>59</b>   |

Table S2. Average normalized relative abundance of viruses detected.

| Strand                 | Segments | Envelope                    | Family | Genus                | Species |               |        |                                                             |                |                    |        |                                      |        |
|------------------------|----------|-----------------------------|--------|----------------------|---------|---------------|--------|-------------------------------------------------------------|----------------|--------------------|--------|--------------------------------------|--------|
| double stranded<br>DNA | 7.59%    | enveloped DNA               | 0.09%  | Herpesviridae        | 0.09%   | Iltovirus     | 0.02%  | Gallid alphaherpesvirus 1<br>Meleagrid                      | 0.02%          |                    |        |                                      |        |
|                        |          |                             |        |                      |         | Mardivirus    | 0.06%  | alphaherpesvirus 1<br>Gallid alphaherpesvirus<br>2&3        | 0.01%<br>0.06% |                    |        |                                      |        |
| single stranded<br>DNA | 19.12%   | non-enveloped<br>DNA        | 7.50%  | Adenoviridae         | 7.50%   | Aviadenovirus | 7.50%  | Fowl aviadenovirus                                          | 7.50%          |                    |        |                                      |        |
|                        |          | non-enveloped<br>DNA        | 19.12% | Circoviridae         | 19.12%  | Gyrovirus     | 19.12% | Avian gyrovirus                                             | 19.12%         |                    |        |                                      |        |
| single stranded<br>RNA | 73.95%   | positive, non-<br>segmented | 73.64% | non-enveloped<br>RNA | 0.77%   | Astroviridae  | 0.74%  | Avastrovirus                                                | 0.74%          | Chicken astrovirus | 0.74%  |                                      |        |
|                        |          |                             |        |                      |         |               |        | Picornoviridae                                              | 0.02%          | Sicivirus          | 0.02%  | Chicken sicivirus JSY                | 0.02%  |
|                        |          |                             |        |                      |         | enveloped RNA | 72.87% | Coronaviridae                                               | 24.62%         | Gammacoronavirus   | 24.62% | Avian infectious<br>bronchitis virus | 24.62% |
|                        |          |                             |        |                      |         |               |        |                                                             |                | Retroviridae       | 48.25% | Unclassified<br>Retrovirus           | 48.25% |
| negative, segmented    | 0.31%    | enveloped RNA               | 0.31%  | Birnaviridae         | 0.31%   | Avibirnavirus | 0.31%  | Avian carcinoma virus<br>Infectious bursal disease<br>virus | 0.01%<br>0.31% |                    |        |                                      |        |

Table S3. Normalized abundance of detected eukaryotic viruses at the species level.

| Species                                  | Week 0   | Week 1    | Week 2   | Week 3   | Week 4    | Week 5   | Week 6    | Week 7   |
|------------------------------------------|----------|-----------|----------|----------|-----------|----------|-----------|----------|
| <i>Gallid alphaherpesvirus 1</i>         | 33.52    | 0.00      | 0.00     | 0.00     | 0.00      | 0.00     | 0.00      | 0.00     |
| <i>Meleagrid alphaherpesvirus 1</i>      | 0.00     | 0.00      | 41.97    | 0.00     | 31.40     | 0.00     | 0.00      | 0.00     |
| <i>Gallid alphaherpesvirus 2&amp;3</i>   | 0.00     | 0.00      | 0.00     | 63.84    | 1186.57   | 71.12    | 57.03     | 0.00     |
| <i>Avian gyrovirus</i>                   | 0.00     | 0.00      | 0.00     | 0.00     | 727764.39 | 12256.84 | 147165.92 | 68358.83 |
| <i>Fowl aviadenovirus</i>                | 0.00     | 0.00      | 0.00     | 0.00     | 0.00      | 0.00     | 507048.92 | 12450.59 |
| <i>Chicken astrovirus</i>                | 0.00     | 1490.69   | 0.00     | 0.00     | 0.00      | 0.00     | 0.00      | 0.00     |
| <i>Chicken sicinivirus JSY</i>           | 0.00     | 0.00      | 0.00     | 42.11    | 42.11     | 0.00     | 0.00      | 0.00     |
| <i>Avian carcinoma virus</i>             | 0.00     | 0.00      | 0.00     | 0.00     | 0.00      | 78.52    | 0.00      | 78.52    |
| <i>Avian infectious bronchitis virus</i> | 74.78    | 109675.86 | 67740.67 | 4048.83  | 15467.52  | 23999.29 | 207253.45 | 35914.02 |
| <i>Infectious bursal disease virus</i>   | 0.00     | 0.00      | 0.00     | 0.00     | 64.88     | 0.00     | 22191.95  | 194.65   |
| <i>Avian Endogenous Retrovirus</i>       | 19470.62 | 89108.98  | 47135.34 | 20718.00 | 76251.66  | 65275.35 | 67618.14  | 68898.80 |

Table S4. Normalized percent relative abundance of detected eukaryotic viruses at the species level. Sum of columns = 100%.

| Family           | Species                                  | Week<br>0 | Week<br>1 | Week<br>2 | Week<br>3 | Week<br>4 | Week<br>5 | Week<br>6 | Week<br>7 | Frequency |
|------------------|------------------------------------------|-----------|-----------|-----------|-----------|-----------|-----------|-----------|-----------|-----------|
| Poxviridae       |                                          | 0.00      | 0.00      | 0.00      | 0.00      | 0.00      | 0.00      | 0.00      | 0.00      | 0.0       |
|                  | <i>Gallid alphaherpesvirus 1</i>         | 0.17      | 0.00      | 0.00      | 0.00      | 0.00      | 0.00      | 0.00      | 0.00      | 12.5      |
| Herpesviridae    | <i>Meleagrid alphaherpesvirus 1</i>      | 0.00      | 0.00      | 0.04      | 0.00      | 0.00      | 0.00      | 0.00      | 0.00      | 12.5      |
|                  | <i>Gallid alphaherpesvirus 2&amp;3</i>   | 0.00      | 0.00      | 0.00      | 0.26      | 0.14      | 0.07      | 0.01      | 0.00      | 50.0      |
| Adenoviridae     | <i>Fowl aviadenovirus</i>                | 0.00      | 0.00      | 0.00      | 0.00      | 0.00      | 0.00      | 53.30     | 6.70      | 25.0      |
| Hepeviridae      |                                          | 0.00      | 0.00      | 0.00      | 0.00      | 0.00      | 0.00      | 0.00      | 0.00      | 0.0       |
| Hepadnaviridae   |                                          | 0.00      | 0.00      | 0.00      | 0.00      | 0.00      | 0.00      | 0.00      | 0.00      | 0.0       |
| Genomiviridae    |                                          | 0.00      | 0.00      | 0.00      | 0.00      | 0.00      | 0.00      | 0.00      | 0.00      | 0.0       |
| Circoviridae     | <i>Avian gyrovirus</i>                   | 0.00      | 0.00      | 0.00      | 0.00      | 88.66     | 12.05     | 15.47     | 36.77     | 50.0      |
| Parvoviridae     |                                          | 0.00      | 0.00      | 0.00      | 0.00      | 0.00      | 0.00      | 0.00      | 0.00      | 0.0       |
| Reoviridae       |                                          | 0.00      | 0.00      | 0.00      | 0.00      | 0.00      | 0.00      | 0.00      | 0.00      | 0.0       |
| Orthomyxoviridae |                                          | 0.00      | 0.00      | 0.00      | 0.00      | 0.00      | 0.00      | 0.00      | 0.00      | 0.0       |
| Phenuoviridae    |                                          | 0.00      | 0.00      | 0.00      | 0.00      | 0.00      | 0.00      | 0.00      | 0.00      | 0.0       |
| Birnaviridae     | <i>Infectious bursal disease virus</i>   | 0.00      | 0.00      | 0.00      | 0.00      | 0.01      | 0.00      | 2.33      | 0.10      | 37.5      |
| Pneumoviridae    |                                          | 0.00      | 0.00      | 0.00      | 0.00      | 0.00      | 0.00      | 0.00      | 0.00      | 0.0       |
| Paramyxoviridae  |                                          | 0.00      | 0.00      | 0.00      | 0.00      | 0.00      | 0.00      | 0.00      | 0.00      | 0.0       |
| Astroviridae     | <i>Chicken astrovirus</i>                | 0.00      | 0.74      | 0.00      | 0.00      | 0.00      | 0.00      | 0.00      | 0.00      | 12.5      |
| Picornoviridae   | <i>Chicken sicinivirus JSY</i>           | 0.00      | 0.00      | 0.00      | 0.17      | 0.01      | 0.00      | 0.00      | 0.00      | 25.0      |
| Retroviridae     | <i>Avian Endogenous Retrovirus</i>       | 99.45     | 44.49     | 41.02     | 83.30     | 9.29      | 64.20     | 7.11      | 37.06     | 100.0     |
|                  | <i>Avian carcinoma virus</i>             | 0.00      | 0.00      | 0.00      | 0.00      | 0.00      | 0.08      | 0.00      | 0.04      | 25.0      |
| Flaviviridae     |                                          | 0.00      | 0.00      | 0.00      | 0.00      | 0.00      | 0.00      | 0.00      | 0.00      | 0.0       |
| Coronaviridae    | <i>Avian infectious bronchitis virus</i> | 0.38      | 54.76     | 58.95     | 16.28     | 1.88      | 23.60     | 21.79     | 19.32     | 100.0     |

Table S5. Normalized percent relative abundance of detected eukaryotic viruses at the family level. Sum of rows = 100%

| <b>Viral Family</b> | <b>Week<br/>0</b> | <b>Week<br/>1</b> | <b>Week<br/>2</b> | <b>Week<br/>3</b> | <b>Week<br/>4</b> | <b>Week<br/>5</b> | <b>Week<br/>6</b> | <b>Week<br/>7</b> |
|---------------------|-------------------|-------------------|-------------------|-------------------|-------------------|-------------------|-------------------|-------------------|
| Poxviridae          | 0.00              | 0.00              | 0.00              | 0.00              | 0.00              | 0.00              | 0.00              | 0.00              |
| Herpesviridae       | 24.86             | 0.00              | 5.30              | 37.27             | 21.54             | 10.16             | 0.87              | 0.00              |
| Adenoviridae        | 0.00              | 0.00              | 0.00              | 0.00              | 0.00              | 0.00              | 88.84             | 11.16             |
| Hepeviridae         | 0.00              | 0.00              | 0.00              | 0.00              | 0.00              | 0.00              | 0.00              | 0.00              |
| Hepadnaviridae      | 0.00              | 0.00              | 0.00              | 0.00              | 0.00              | 0.00              | 0.00              | 0.00              |
| Genomiviridae       | 0.00              | 0.00              | 0.00              | 0.00              | 0.00              | 0.00              | 0.00              | 0.00              |
| Circoviridae        | 0.00              | 0.00              | 0.00              | 0.00              | 57.97             | 7.88              | 10.11             | 24.04             |
| Parvoviridae        | 0.00              | 0.00              | 0.00              | 0.00              | 0.00              | 0.00              | 0.00              | 0.00              |
| Reoviridae          | 0.00              | 0.00              | 0.00              | 0.00              | 0.00              | 0.00              | 0.00              | 0.00              |
| Orthomyxoviridae    | 0.00              | 0.00              | 0.00              | 0.00              | 0.00              | 0.00              | 0.00              | 0.00              |
| Phenuoviridae       | 0.00              | 0.00              | 0.00              | 0.00              | 0.00              | 0.00              | 0.00              | 0.00              |
| Birnaviridae        | 0.00              | 0.00              | 0.00              | 0.00              | 0.32              | 0.00              | 95.39             | 4.28              |
| Pneumoviridae       | 0.00              | 0.00              | 0.00              | 0.00              | 0.00              | 0.00              | 0.00              | 0.00              |
| Paramyxoviridae     | 0.00              | 0.00              | 0.00              | 0.00              | 0.00              | 0.00              | 0.00              | 0.00              |
| Astroviridae        | 0.00              | 100.00            | 0.00              | 0.00              | 0.00              | 0.00              | 0.00              | 0.00              |
| Picornoviridae      | 0.00              | 0.00              | 0.00              | 97.06             | 2.94              | 0.00              | 0.00              | 0.00              |
| Retroviridae        | 25.76             | 11.53             | 10.63             | 21.58             | 2.41              | 16.65             | 1.84              | 9.61              |
| Flaviviridae        | 0.00              | 0.00              | 0.00              | 0.00              | 0.00              | 0.00              | 0.00              | 0.00              |
| Coronaviridae       | 0.19              | 27.80             | 29.93             | 8.26              | 0.96              | 11.98             | 11.06             | 9.81              |

Table S6. Average relative abundance of detected bacteria.

| Phylum         |            | Class          |               | Order             |                     | Family             |                   | Genus             |                 |               |        |
|----------------|------------|----------------|---------------|-------------------|---------------------|--------------------|-------------------|-------------------|-----------------|---------------|--------|
| Actinobacteria | 24.00%     | Actinobacteria | 24.00%        | Corynebacteriales | 5.25%               | Corynebacteriaceae | 5.25%             |                   | 5.25%           |               |        |
|                |            |                |               | Micrococcales     | 13.53%              |                    | Brevibacteriaceae | 5.67%             | Brevibacterium  | 5.67%         |        |
|                |            |                |               |                   |                     |                    | Dermabacteraceae  | 5.00%             | Brachybacterium | 5.00%         |        |
|                |            |                |               |                   |                     |                    | Micrococcaceae    | 2.87%             | Yaniella        | 0.87%         |        |
|                |            |                |               |                   |                     |                    |                   |                   |                 |               | 2.00%  |
|                |            |                |               |                   | Streptosporangiales | 5.22%              | Nocardiopsaceae   | 5.22%             | Nocardiopsis    | 5.22%         |        |
| Bacteroidetes  | 5.78%      | Bacteroidia    | 3.38%         | Bacteroidales     | 3.38%               | Bacteroidaceae     | 2.33%             | Bacteroides       | 2.33%           |               |        |
|                |            |                |               |                   |                     | Prevotellaceae     | 1.05%             | Alloprevotella    | 1.05%           |               |        |
|                |            | Flavobacteria  | 2.40%         | Flavobacteriales  | 2.40%               | Flavobacteriaceae  | 2.40%             | Chryseobacterium  | 2.40%           |               |        |
| Firmicutes     | 56.17%     | Bacilli        | 49.02%        | Bacillales        | 21.35%              | Bacillaceae        | 7.87%             | Lentibacillus     | 0.83%           |               |        |
|                |            |                |               |                   |                     |                    |                   | Paucisalibacillus | 1.93%           |               |        |
|                |            |                |               |                   |                     |                    |                   |                   | 5.10%           |               |        |
|                |            |                |               |                   |                     |                    | Staphylococcaceae | 11.43%            | Jeotgalicoccus  | 0.68%         |        |
|                |            |                |               |                   |                     |                    |                   |                   | Salinicoccus    | 2.07%         |        |
|                |            |                |               |                   |                     |                    |                   |                   | Staphylococcus  | 8.68%         |        |
|                |            |                |               |                   | Planococcaceae      | 2.05%              |                   | 2.05%             |                 |               |        |
|                |            |                |               | Lactobacillales   | 27.67%              | Aerococcaceae      | 0.60%             | Facklamia         | 0.60%           |               |        |
|                |            |                |               |                   |                     |                    |                   | Lactobacillaceae  | 14.50%          | Lactobacillus | 14.50% |
|                |            |                |               |                   |                     |                    |                   | Leuconostocaceae  | 1.10%           | Weissella     | 1.10%  |
|                |            |                |               |                   |                     |                    |                   | Streptococcaceae  | 2.03%           | Streptococcus | 2.03%  |
|                |            |                |               |                   |                     |                    |                   | Lactobacillales   | 8.28%           |               | 8.28%  |
|                |            |                |               |                   |                     |                    |                   |                   |                 |               |        |
|                | Clostridia | 7.15%          | Clostridiales | 7.15%             | Lachnospiraceae     | 2.59%              | Lachnoclostridium | 1.83%             |                 |               |        |

|                |        |                     |        |                  |                       |                    |                  |                          |        |
|----------------|--------|---------------------|--------|------------------|-----------------------|--------------------|------------------|--------------------------|--------|
|                |        |                     |        |                  |                       |                    |                  | 0.77%                    |        |
|                |        |                     |        |                  | Ruminococcaceae       | 3.98%              | Anaerotruncus    | 0.60%                    |        |
|                |        |                     |        |                  |                       |                    | Faecalibacterium | 3.00%                    |        |
|                |        |                     |        |                  |                       |                    | Subdoligranulum  | 0.38%                    |        |
|                |        |                     |        |                  | Peptostreptococcaceae | 0.58%              |                  | 0.58%                    |        |
| Proteobacteria | 39.28% | Betaproteobacteria  | 3.00%  | Burkholderiales  | 3.00%                 | Oxalobacteraceae   | 3.00%            | 3.00%                    |        |
|                |        | Gammaproteobacteria | 36.28% | Pasteurellales   | 27.33%                | Pasteurellaceae    | 27.33%           | Gallibacterium           | 27.33% |
|                |        |                     |        | Pseudomonadales  | 5.03%                 | Pseudomonadaceae   | 5.03%            | Pseudomonas              | 5.03%  |
|                |        |                     |        | Xanthomonadales  | 3.00%                 | Xanthomonadaceae   | 3.00%            | Xanthomonas              | 3.00%  |
|                |        |                     |        | Enterobacterales | 0.92%                 | Enterobacteriaceae | 0.92%            | Escherichia-<br>Shigella | 0.92%  |

---

Table S7. Relative abundance of detected bacteria at the genera level. (Taxa that could not be assigned a genus are displayed using the highest taxonomic level that could be assigned to them: \* (family), \*\* (class), or \*\*\* (order))

| Family             | Genus                    | Week 0 | Week 1 | Week 3 | Week 4 | Week 5 | Week 7 | Frequency |
|--------------------|--------------------------|--------|--------|--------|--------|--------|--------|-----------|
| Corynebacteriaceae | Corynebacteriaceae*      | 6.00   | 1.00   | 1.00   | 1.00   | 0.50   | 22.00  | 100       |
| Brevibacteriaceae  | <i>Brevibacterium</i>    | 9.00   | 6.00   | 7.00   | 5.00   | 4.00   | 3.00   | 100       |
| Dermabacteraceae   | <i>Brachybacterium</i>   | 8.00   | 6.00   | 5.00   | 7.00   | 2.00   | 2.00   | 100       |
| Micrococcaceae     | <i>Yaniella</i>          | 1.00   | 1.00   | 1.00   | 1.00   | 1.00   | 0.20   | 100       |
|                    | Micrococcaceae*          | 2.00   | 0.00   | 0.00   | 0.00   | 0.00   | 0.00   | 16.7      |
| Nocardiopsaceae    | <i>Nocardiopsis</i>      | 3.00   | 1.00   | 1.00   | 21.00  | 0.10   | 0.00   | 83.3      |
| Bacteroidaceae     | <i>Bacteroides</i>       | 0.00   | 0.00   | 3.00   | 2.00   | 2.00   | 0.00   | 50        |
| Prevotellaceae     | <i>Alloprevotella</i>    | 2.00   | 0.00   | 0.00   | 0.00   | 0.10   | 0.00   | 33.3      |
| Flavobacteriaceae  | <i>Chryseobacterium</i>  | 7.00   | 0.00   | 0.00   | 0.10   | 0.10   | 0.00   | 50        |
| Bacillaceae        | <i>Lentibacillus</i>     | 2.00   | 0.40   | 0.10   | 0.00   | 0.00   | 0.00   | 50        |
|                    | <i>Paucisalibacillus</i> | 1.00   | 2.00   | 2.00   | 6.00   | 0.30   | 0.30   | 100       |
|                    | <i>Jeotgalicoccus</i>    | 1.00   | 0.40   | 0.30   | 1.00   | 0.40   | 1.00   | 100       |
| Staphylococcaceae  | <i>Salinicoccus</i>      | 1.00   | 2.00   | 2.00   | 4.00   | 1.00   | 2.40   | 100       |
|                    | <i>Staphylococcus</i>    | 3.00   | 7.10   | 11.00  | 16.00  | 6.00   | 9.00   | 100       |
|                    | Bacillaceae*             | 6.50   | 6.30   | 4.20   | 10.40  | 1.20   | 2.00   | 100       |
| Planococcaceae     | Planococcaceae*          | 4.00   | 0.00   | 0.00   | 0.00   | 0.10   | 0.00   | 33.3      |
| Aerococcaceae      | <i>Facklamia</i>         | 2.00   | 0.00   | 0.10   | 0.20   | 0.00   | 0.10   | 66.7      |
| Lactobacillaceae   | <i>Lactobacillus</i>     | 5.10   | 14.10  | 34.10  | 7.00   | 18.20  | 8.50   | 100       |
| Leuconostocaceae   | <i>Weissella</i>         | 0.00   | 1.00   | 0.40   | 3.00   | 1.00   | 0.10   | 83.3      |
| Streptococcaceae   | <i>Streptococcus</i>     | 8.00   | 1.10   | 0.10   | 0.40   | 0.40   | 2.20   | 100       |
| Lactobacillales    | Lactobacillales**        | 1.00   | 23.00  | 0.10   | 0.00   | 11.00  | 6.30   | 83.3      |
|                    | <i>Lachnoclostridium</i> | 0.00   | 3.00   | 2.00   | 2.00   | 0.30   | 0.00   | 66.7      |
| Lachnospiraceae    | <i>Anaerotruncus</i>     | 0.00   | 1.00   | 1.00   | 0.10   | 0.30   | 0.00   | 66.7      |
|                    | <i>Faecalibacterium</i>  | 0.00   | 0.00   | 5.00   | 2.00   | 4.00   | 1.00   | 66.7      |
| Ruminococcaceae    | <i>Subdoligranulum</i>   | 0.00   | 0.00   | 1.00   | 0.20   | 0.20   | 0.10   | 66.7      |



|                       |                             |       |      |      |      |       |       |      |
|-----------------------|-----------------------------|-------|------|------|------|-------|-------|------|
|                       | Lachnospiraceae*            | 0.00  | 2.00 | 0.20 | 0.10 | 0.00  | 0.00  | 50   |
|                       | Peptostreptococcaceae*      | 0.00  | 1.00 | 0.10 | 1.00 | 0.40  | 0.40  | 83.3 |
| Peptostreptococcaceae | Bacilli***                  | 0.50  | 1.00 | 2.40 | 1.40 | 0.50  | 0.00  | 83.3 |
| Oxalobacteraceae      | Oxalobacteraceae*           | 3.00  | 0.00 | 0.00 | 0.00 | 0.00  | 0.00  | 16.7 |
| Pasteurellaceae       | <i>Gallibacterium</i>       | 0.00  | 0.00 | 1.00 | 0.00 | 44.00 | 37.00 | 50   |
| Pseudomonadaceae      | <i>Pseudomonas</i>          | 13.00 | 2.00 | 0.00 | 0.00 | 0.10  | 0.00  | 50   |
| Xanthomonadaceae      | <i>Xanthomonas</i>          | 3.00  | 0.00 | 0.00 | 0.00 | 0.00  | 0.00  | 16.7 |
| Enterobacteriaceae    | <i>Escherichia-Shigella</i> | 0.10  | 2.00 | 1.00 | 2.00 | 0.20  | 0.20  | 100  |

Table S8. Average normalized relative abundance of detected bacteriophage.

| Order                               |         | Family                                 |        | Genus                    |        | Species                                 | Average |                                          |        |
|-------------------------------------|---------|----------------------------------------|--------|--------------------------|--------|-----------------------------------------|---------|------------------------------------------|--------|
| Caudovirales                        | 142.34% | Myoviridae                             | 70.99% | P1virus                  | 1.83%  | <i>Enterobacteria phage P1</i>          | 0.75%   |                                          |        |
|                                     |         |                                        |        |                          |        | <i>Salmonella phage SJ46</i>            | 1.08%   |                                          |        |
|                                     |         |                                        |        | Spounavirinae            | 6.97%  | <i>Staphylococcus phage GH15</i>        | 0.67%   |                                          |        |
|                                     |         |                                        |        |                          |        | <i>Staphylococcus phage MCE-2014</i>    | 1.29%   |                                          |        |
|                                     |         |                                        |        |                          |        | <i>Staphylococcus phage P108</i>        | 1.13%   |                                          |        |
|                                     |         |                                        |        |                          |        | <i>Staphylococcus phage phiPLA-RODI</i> | 2.50%   |                                          |        |
|                                     |         |                                        |        |                          |        | <i>Staphylococcus phage phiSA012</i>    | 1.39%   |                                          |        |
|                                     |         |                                        |        |                          |        | <i>Enterobacteria phage RB55</i>        | 39.16%  |                                          |        |
|                                     |         |                                        |        | unclassified Myoviridae  | 22.31% | <i>Shigella phage SHFML-11</i>          | 0.73%   |                                          |        |
|                                     |         |                                        |        |                          |        | <i>Enterobacteria phage P88</i>         | 2.47%   |                                          |        |
|                                     |         |                                        |        |                          |        | <i>Enterobacteria phage phi92</i>       | 2.78%   |                                          |        |
|                                     |         |                                        |        |                          |        | <i>Enterobacteria phage Sfl</i>         | 2.09%   |                                          |        |
|                                     |         |                                        |        |                          |        | <i>Salmonella phage RE-2010</i>         | 6.53%   |                                          |        |
|                                     |         |                                        |        |                          |        | <i>Shigella phage SflV</i>              | 8.44%   |                                          |        |
|                                     |         |                                        |        |                          |        | <i>Enterobacteria phage T7</i>          | 6.75%   |                                          |        |
|                                     |         |                                        |        | Podoviridae              | 40.19% | Autographivirinae                       | 6.75%   | <i>Escherichia phage TL-2011b</i>        | 8.23%  |
|                                     |         |                                        |        |                          |        |                                         |         | <i>Enterobacteria phage VT2phi_272</i>   | 4.10%  |
|                                     |         |                                        |        |                          |        |                                         |         | <i>Stx2 converting phage vB_EcoP_24B</i> | 20.05% |
|                                     |         |                                        |        | unclassified Podoviridae | 1.06%  | <i>Enterobacteria phage IME10</i>       | 1.06%   |                                          |        |
|                                     |         |                                        |        |                          |        | <i>Enterobacteria phage lambda</i>      | 2.55%   |                                          |        |
|                                     |         |                                        |        | Siphoviridae             | 31.16% | Lambdavirus                             | 11.15%  | <i>Enterobacteria phage mEp460</i>       | 2.63%  |
|                                     |         |                                        |        |                          |        |                                         |         | <i>Stx2-converting phage 1717</i>        | 3.99%  |
|                                     |         |                                        |        |                          |        |                                         |         | <i>Staphylococcus phage SPbeta-like</i>  | 0.50%  |
| <i>Lactobacillus prophage Lj928</i> | 6.35%   |                                        |        |                          |        |                                         |         |                                          |        |
| <i>Microbacterium phage Min1</i>    | 2.51%   |                                        |        |                          |        |                                         |         |                                          |        |
| unclassified Siphoviridae           | 19.51%  | <i>Staphylococcus phage phiRS7</i>     | 1.84%  |                          |        |                                         |         |                                          |        |
|                                     |         | <i>Staphylococcus phage StB20</i>      | 4.79%  |                          |        |                                         |         |                                          |        |
|                                     |         | <i>Staphylococcus phage StB20-like</i> | 4.02%  |                          |        |                                         |         |                                          |        |
|                                     |         | <i>Enterobacteria phage YYZ-2008</i>   | 4.25%  |                          |        |                                         |         |                                          |        |
|                                     |         | <i>Uncultured phage crAssphage</i>     | 0.59%  |                          |        |                                         |         |                                          |        |
| Unclassified                        | 4.83%   | Unclassified                           | 4.83%  | Unclassified             | 4.83%  |                                         |         |                                          |        |

Table S9. Normalized abundance of detected bacteriophage at the species level.

| Species                                  | Week 0   | Week 1   | Week 2  | Week 3   | Week 4  | Week 5  | Week 6  | Week 7  |
|------------------------------------------|----------|----------|---------|----------|---------|---------|---------|---------|
| <i>Enterobacteria phage IME10</i>        | 202.28   | 1258.09  | 150.16  | 611.33   | 0.00    | 0.00    | 0.00    | 0.00    |
| <i>Staphylococcus phage SPbeta-like</i>  | 313.94   | 0.00     | 0.00    | 284.63   | 90.51   | 0.00    | 0.00    | 0.00    |
| <i>Enterobacteria phage P88</i>          | 0.00     | 928.47   | 0.00    | 1353.48  | 484.17  | 0.00    | 0.00    | 0.00    |
| <i>Staphylococcus phage GH15</i>         | 0.00     | 59.46    | 0.00    | 1040.16  | 41.34   | 0.00    | 0.00    | 0.00    |
| <i>Shigella phage SHFML-11</i>           | 140.99   | 97.43    | 69.77   | 0.00     | 33.87   | 160.41  | 0.00    | 70.65   |
| <i>Enterobacteria phage P1</i>           | 253.79   | 613.83   | 62.80   | 894.81   | 0.00    | 0.00    | 0.00    | 0.00    |
| <i>Staphylococcus phage StB20-like</i>   | 0.00     | 0.00     | 0.00    | 3873.58  | 568.48  | 168.27  | 0.00    | 0.00    |
| <i>Staphylococcus phage P108</i>         | 0.00     | 0.00     | 0.00    | 1290.95  | 123.15  | 48.60   | 0.00    | 0.00    |
| <i>Staphylococcus phage phiSA012</i>     | 0.00     | 0.00     | 0.00    | 1108.69  | 244.06  | 48.16   | 0.00    | 0.00    |
| <i>Microbacterium phage Min1</i>         | 2075.63  | 896.48   | 0.00    | 0.00     | 0.00    | 0.00    | 412.69  | 0.00    |
| <i>Staphylococcus phage phiRS7</i>       | 924.06   | 191.57   | 0.00    | 3071.89  | 133.20  | 315.42  | 0.00    | 0.00    |
| <i>Enterobacteria phage cdtI</i>         | 170.56   | 2298.33  | 0.00    | 773.17   | 245.85  | 0.00    | 135.64  | 128.21  |
| <i>Enterobacteria phage SfiI</i>         | 1462.35  | 1732.38  | 310.15  | 1578.36  | 0.00    | 178.27  | 0.00    | 0.00    |
| <i>Staphylococcus phage StB20</i>        | 0.00     | 0.00     | 0.00    | 2979.68  | 1421.19 | 168.27  | 156.82  | 148.23  |
| <i>Salmonella phage SJ46</i>             | 387.63   | 1285.79  | 57.55   | 937.18   | 223.50  | 132.32  | 61.66   | 0.00    |
| <i>Staphylococcus phage MCE-2014</i>     | 56.51    | 58.58    | 0.00    | 2732.68  | 0.00    | 144.68  | 0.00    | 42.48   |
| <i>Enterobacteria phage lambda</i>       | 2480.22  | 2399.55  | 122.74  | 249.85   | 476.68  | 141.10  | 526.00  | 0.00    |
| <i>Enterobacteria phage phi92</i>        | 0.00     | 55.94    | 0.00    | 978.52   | 933.43  | 184.20  | 0.00    | 0.00    |
| <i>Enterobacteria phage mEp460</i>       | 2702.67  | 3175.06  | 267.49  | 1089.04  | 0.00    | 461.27  | 143.29  | 0.00    |
| <i>Lactobacillus prophage Lj928</i>      | 0.00     | 10612.23 | 465.28  | 0.00     | 150.58  | 0.00    | 0.00    | 0.00    |
| <i>Staphylococcus phage phiIPLA-RODI</i> | 56.34    | 0.00     | 0.00    | 3490.40  | 284.23  | 480.77  | 0.00    | 42.35   |
| <i>Salmonella phage RE-2010</i>          | 9637.67  | 4873.26  | 523.47  | 4617.59  | 847.08  | 802.38  | 186.95  | 353.40  |
| <i>Enterobacteria phage T7</i>           | 7630.75  | 5620.16  | 298.12  | 3944.67  | 434.18  | 856.81  | 798.51  | 452.84  |
| <i>Stx2-converting phage 1717</i>        | 5032.73  | 4012.93  | 478.95  | 2729.93  | 186.01  | 550.60  | 205.26  | 194.00  |
| <i>Enterobacteria phage VT2phi_272</i>   | 6809.25  | 3781.24  | 270.78  | 3123.52  | 438.18  | 518.81  | 386.81  | 91.40   |
| <i>Shigella phage SfiV</i>               | 11295.95 | 7318.20  | 898.40  | 3962.43  | 436.14  | 860.67  | 1283.37 | 0.00    |
| <i>Escherichia phage TL-2011b</i>        | 11998.06 | 7981.90  | 398.79  | 4600.12  | 1032.51 | 916.89  | 996.93  | 269.22  |
| <i>Enterobacteria phage RB55</i>         | 0.00     | 0.00     | 3982.75 | 0.00     | 0.00    | 5388.95 | 0.00    | 1284.90 |
| <i>Stx2 converting phage vB_EcoP_24B</i> | 38098.43 | 20466.63 | 825.71  | 12816.52 | 2004.26 | 949.24  | 3096.30 | 522.60  |
| <i>Uncultured phage crAssphage</i>       | 1487.20  | 171.29   | 0.00    | 124.85   | 0.00    | 0.00    | 0.00    | 0.00    |
| <i>Enterobacteria phage YYZ-2008</i>     | 5989.66  | 3482.95  | 108.44  | 2428.26  | 526.45  | 0.00    | 697.11  | 109.82  |

Table S10. Normalized percent relative abundance of detected bacteriophage at the species level.

| Family                              | Species                                  | Week 0 | Week 1 | Week 2 | Week 3 | Week 4 | Week 5 | Week 6 | Week 7 | Frequency |      |
|-------------------------------------|------------------------------------------|--------|--------|--------|--------|--------|--------|--------|--------|-----------|------|
| Myoviridae                          | <i>Enterobacteria phage P88</i>          |        | 1.114  |        | 2.030  | 4.262  |        |        |        | 50        |      |
|                                     | <i>Staphylococcus phage GH15</i>         |        | 0.071  |        | 1.560  | 0.364  |        |        |        | 37.5      |      |
|                                     | <i>Shigella phage SHFML-11</i>           | 0.129  | 0.117  | 0.751  | 0.000  | 0.298  | 1.190  |        | 1.904  | 75        |      |
|                                     | <i>Enterobacteria phage P1</i>           | 0.232  | 0.736  | 0.676  | 1.342  |        |        |        |        | 50        |      |
|                                     | <i>Staphylococcus phage P108</i>         |        |        |        | 1.936  | 1.084  | 0.361  |        |        | 37.5      |      |
|                                     | <i>Staphylococcus phage phiSA012</i>     |        |        |        | 1.663  | 2.149  | 0.357  |        |        | 37.5      |      |
|                                     | <i>Enterobacteria phage Sfl</i>          | 1.339  | 2.078  | 3.338  | 2.367  | 0.000  | 1.323  |        |        | 62.5      |      |
|                                     | <i>Salmonella phage SJ46</i>             | 0.355  | 1.542  | 0.619  | 1.405  | 1.968  | 0.982  | 0.678  |        | 87.5      |      |
|                                     | <i>Staphylococcus phage MCE-2014</i>     | 0.052  | 0.070  |        | 4.098  |        |        | 1.074  |        | 1.145     | 62.5 |
|                                     | <i>Enterobacteria phage phi92</i>        |        | 0.067  |        | 1.467  | 8.218  | 1.367  |        |        |           | 50   |
|                                     | <i>Staphylococcus phage phiPLA-RODI</i>  | 0.052  |        |        | 5.234  | 2.502  | 3.568  |        |        | 1.141     | 62.5 |
|                                     | <i>Salmonella phage RE-2010</i>          | 8.825  | 5.845  | 5.634  | 6.924  | 7.457  | 5.954  | 2.057  | 9.525  |           | 100  |
|                                     | <i>Shigella phage SflV</i>               | 10.344 | 8.778  | 9.669  | 5.942  | 3.840  | 6.387  | 14.123 |        |           | 87.5 |
|                                     | <i>Enterobacteria phage RB55</i>         |        |        | 42.865 |        |        |        | 39.989 |        | 34.632    | 37.5 |
| Podoviridae                         | <i>Enterobacteria phage IME10</i>        | 0.185  | 1.509  | 1.616  | 0.917  |        |        |        |        | 50        |      |
|                                     | <i>Enterobacteria phage T7</i>           | 6.987  | 6.741  | 3.209  | 5.915  | 3.822  | 6.358  | 8.787  | 12.206 | 100       |      |
|                                     | <i>Enterobacteria phage VT2phi_272</i>   | 6.235  | 4.535  | 2.914  | 4.684  | 3.858  | 3.850  | 4.257  | 2.464  | 100       |      |
|                                     | <i>Escherichia phage TL-2011b</i>        | 10.987 | 9.574  | 4.292  | 6.898  | 9.090  | 6.804  | 10.970 | 7.256  | 100       |      |
|                                     | <i>Stx2 converting phage vB_EcoP_24B</i> | 34.887 | 24.549 | 8.887  | 19.219 | 17.645 | 7.044  | 34.073 | 14.086 | 100       |      |
| Siphoviridae                        | <i>Staphylococcus phage SPbeta-like</i>  | 0.287  |        |        | 0.427  | 0.797  |        |        |        | 37.5      |      |
|                                     | <i>Staphylococcus phage StB20-like</i>   |        |        |        | 5.809  | 5.005  | 1.249  |        |        | 37.5      |      |
|                                     | <i>Microbacterium phage Min1</i>         | 1.901  | 1.075  |        |        |        |        | 4.541  |        | 37.5      |      |
|                                     | <i>Staphylococcus phage phiRS7</i>       | 0.846  | 0.230  |        | 4.606  | 1.173  | 2.341  |        |        | 62.5      |      |
|                                     | <i>Enterobacteria phage cdtI</i>         | 0.156  | 2.757  |        | 1.159  | 2.164  |        | 1.493  | 3.456  | 75        |      |
|                                     | <i>Staphylococcus phage StB20</i>        |        |        |        | 4.468  | 12.512 | 1.249  | 1.726  | 3.995  | 62.5      |      |
|                                     | <i>Enterobacteria phage lambda</i>       | 2.271  | 2.878  | 1.321  | 0.375  | 4.196  | 1.047  | 5.788  |        | 87.5      |      |
|                                     | <i>Enterobacteria phage mEp460</i>       | 2.475  | 3.808  | 2.879  | 1.633  |        | 3.423  | 1.577  |        | 75        |      |
| <i>Lactobacillus prophage Lj928</i> | 0.000                                    | 12.729 | 5.008  |        | 1.326  |        |        |        | 37.5   |           |      |

|              |                                      |       |       |       |       |       |       |       |       |      |
|--------------|--------------------------------------|-------|-------|-------|-------|-------|-------|-------|-------|------|
|              | <i>Stx2-converting phage 1717</i>    | 4.608 | 4.813 | 5.155 | 4.094 | 1.638 | 4.086 | 2.259 | 5.229 | 100  |
| Unclassified | <i>Uncultured phage crAssphage</i>   | 1.362 | 0.205 |       | 0.187 |       |       |       |       | 37.5 |
|              | <i>Enterobacteria phage YYZ-2008</i> | 5.485 | 4.178 | 1.167 | 3.641 | 4.635 |       | 7.671 | 2.960 | 87.5 |

---

Table S11. Average normalized relative abundance of detected fungi.

| Phylum          | Class             | Order             | Family               | Genus                        | Species                           | Average Abundance           |                             |                             |                             |             |
|-----------------|-------------------|-------------------|----------------------|------------------------------|-----------------------------------|-----------------------------|-----------------------------|-----------------------------|-----------------------------|-------------|
| Ascomycota      | Dothideomycetes   | Capnodiales       | Mycosphaerellaceae   | Zymoseptoria                 | <i>Bipolaris cookei</i>           | 0.02%                       |                             |                             |                             |             |
|                 |                   |                   |                      |                              | <i>Didymella pinodes</i>          | 0.03%                       |                             |                             |                             |             |
|                 |                   |                   |                      |                              | <i>Mycosphaerella graminicola</i> | 0.04%                       |                             |                             |                             |             |
|                 |                   |                   |                      |                              | <i>Pithomyces chartarum</i>       | 0.03%                       |                             |                             |                             |             |
|                 |                   |                   |                      |                              | <i>Stemphylium lycopersici</i>    | 0.02%                       |                             |                             |                             |             |
|                 |                   | Pleosporales      | Astrosphaeriellaceae | Pithomyces                   | <i>Pithomyces chartarum</i>       | 0.04%                       |                             |                             |                             |             |
|                 |                   |                   |                      |                              | <i>Didymella</i>                  | 0.03%                       |                             |                             |                             |             |
|                 |                   |                   |                      |                              | <i>Bipolaris</i>                  | 0.03%                       |                             |                             |                             |             |
|                 |                   |                   |                      |                              | <i>Stemphylium</i>                | 0.00%                       |                             |                             |                             |             |
|                 |                   |                   |                      |                              | <i>Zymoseptoria tritici</i>       | 0.002%                      |                             |                             |                             |             |
|                 | Eurotiomycetes    | Onygenales        | Arthrodermataceae    | Trichophyton                 | <i>Aspergillus fumigatus</i>      | 0.08%                       |                             |                             |                             |             |
|                 |                   |                   |                      |                              | Chaetothyriales                   | Herpotrichiellaceae         | Exophiala                   | <i>Aspergillus nidulans</i> | 0.06%                       |             |
|                 |                   |                   |                      |                              |                                   |                             |                             | Eurotiales                  | Aspergillaceae              | Aspergillus |
|                 |                   |                   |                      |                              | <i>Epidermophyton floccosum</i>   | 0.28%                       |                             |                             |                             |             |
|                 |                   | Eurotiales        | Aspergillaceae       | Penicillium                  | <i>Exophiala dermatitidis</i>     | 0.04%                       |                             |                             |                             |             |
|                 |                   |                   |                      |                              | <i>Penicillium chrysogenum</i>    | 0.13%                       |                             |                             |                             |             |
|                 |                   |                   |                      |                              | <i>Talaromyces marneffeii</i>     | 0.41%                       |                             |                             |                             |             |
|                 |                   | Lecanoromycetes   | Onygenales           | Arthrodermataceae            | Epidermophyton                    | <i>Trichophyton rubrum</i>  | 0.54%                       |                             |                             |             |
|                 |                   |                   |                      |                              |                                   | Lecanorales                 | Parmeliaceae                | Usnea                       | <i>Ricasolia amplissima</i> | 0.01%       |
|                 |                   |                   |                      |                              |                                   |                             |                             |                             | Peltigerales                | Lobariaceae |
|                 |                   |                   |                      |                              |                                   | <i>Amorphotheca resinae</i> | 0.01%                       |                             |                             |             |
| Leotiomycetes   | Helotiales        | Sclerotiniaceae   | Botrytis             | <i>Botrytis cinerea</i>      | 0.003%                            |                             |                             |                             |                             |             |
|                 |                   |                   |                      | Leotiomycetes incertae sedis | Myxotrichaceae                    | Amorphotheca                | <i>Amorphotheca</i>         | 0.00%                       |                             |             |
| Saccharomycetes | Saccharomycetales | Debaryomycetaceae | Candida              |                              |                                   |                             | <i>Candida dubliniensis</i> | 0.01%                       |                             |             |
|                 |                   |                   |                      | Debaryomyces                 | <i>Candida glabrata</i>           | 0.01%                       |                             |                             |                             |             |
|                 |                   |                   |                      |                              | <i>Debaryomyces</i>               | 0.01%                       |                             |                             |                             |             |
|                 |                   |                   |                      | Meyerozyma                   | <i>hansenii</i>                   | 0.01%                       |                             |                             |                             |             |
|                 |                   |                   |                      |                              | <i>Dekkera bruxellensis</i>       | 0.03%                       |                             |                             |                             |             |

|                     |       |                     |       |                         |        |                     |        |                                      |        |
|---------------------|-------|---------------------|-------|-------------------------|--------|---------------------|--------|--------------------------------------|--------|
|                     |       |                     |       | Phaffomycetaceae        | 0.01%  | Wickerhamomyces     | 0.01%  | <i>Eremothecium gossypii</i>         | 0.01%  |
|                     |       |                     |       | Pichiaceae              | 0.02%  | Brettanomyces       | 0.02%  | <i>Eremothecium sinecaudum</i>       | 0.02%  |
|                     |       |                     |       | Saccharomycetaceae      | 0.54%  | Eremothecium        | 0.01%  | <i>Kazachstania Naganishii</i>       | 0.01%  |
|                     |       |                     |       |                         |        |                     |        | <i>Kluyveromyces marxianus</i>       | 0.001% |
|                     |       |                     |       |                         |        | Kazachstania        | 0.01%  | <i>Kluyveromyces lactis</i>          | 0.002% |
|                     |       |                     |       |                         |        |                     |        | <i>Kuraishia capsulata</i>           | 0.01%  |
|                     |       |                     |       |                         |        |                     |        | <i>Lachancea thermotolerans</i>      | 0.01%  |
|                     |       |                     |       |                         |        | Kluyveromyces       | 0.01%  | <i>Meyerozyma guilliermondii</i>     | 0.47%  |
|                     |       |                     |       |                         |        | Lachancea           | 0.46%  | <i>Saccharomyces cerevisiae</i>      | 0.002% |
|                     |       |                     |       |                         |        | Nakaseomyces        | 0.00%  | <i>Sugiyamaella lignohabitans</i>    | 0.004% |
|                     |       |                     |       |                         |        | Saccharomyces       | 0.00%  |                                      |        |
|                     |       |                     |       |                         |        | Tetrapisispora      | 0.05%  | <i>Tetrapisispora blattae</i>        | 0.001% |
|                     |       |                     |       |                         |        |                     |        | <i>Tetrapisispora phaffii</i>        | 0.04%  |
|                     |       |                     |       |                         |        |                     |        | <i>Torulaspora delbrueckii</i>       | 0.01%  |
|                     |       |                     |       |                         |        | Torulaspora         | 0.01%  |                                      |        |
|                     |       |                     |       | Sacc. Incertae sedis    | 98.14% | Kuraishia           | 98.14% | <i>Wickerhamomyces ciferrii</i>      | 98.14% |
|                     |       |                     |       | Trichomonascaceae       | 0.00%  | Sugiyamaella        | 0.00%  | <i>Yarrowia lipolytica</i>           | 0.002% |
| Schizosaccharomyces | 0.00% | Schizosaccharomyces | 0.00% | Schizosaccharomycetales | 0.00%  | Schizosaccharomyces | 0.00%  | <i>Schizosaccharomyces pombe</i>     | 0.002% |
| Sordariomycetes     | 3.37% | Diaporthales        | 0.10% | Cryphonectriaceae       | 0.06%  | Chrysosporthe       | 0.06%  | <i>Chrysosporthe austroafrica</i>    | 0.04%  |
|                     |       |                     |       |                         |        |                     |        | <i>Chrysosporthe deuterocubensis</i> | 0.02%  |
|                     |       |                     |       | Diaporthaceae           | 0.04%  | Diaporthe           | 0.04%  | <i>Clonostachys rosea</i>            | 0.05%  |
|                     |       |                     |       |                         |        |                     |        | <i>Colletotrichum graminicola</i>    | 0.52%  |
|                     |       | Glomerellales       | 0.52% | Glomerellaceae          | 0.52%  | Colletotrichum      | 0.52%  |                                      |        |
|                     |       | Hypocreales         | 2.19% | Bionectriaceae          | 1.47%  | Clonostachys        | 1.47%  | <i>Diaporthe longicolla</i>          | 1.47%  |
|                     |       |                     |       | Hypocreaceae            | 0.22%  | Trichoderma         | 0.22%  | <i>Fusarium circinatum</i>           | 0.22%  |
|                     |       |                     |       |                         |        |                     |        | <i>Fusarium</i>                      |        |
|                     |       |                     |       | Nectriaceae             | 0.50%  | Fusarium            | 0.41%  | <i>graminearum</i>                   | 0.13%  |
|                     |       |                     |       |                         |        |                     |        | <i>Fusarium mangiferae</i>           | 0.22%  |
|                     |       |                     |       |                         |        |                     |        | <i>Gibberella moniliformis</i>       | 0.04%  |

|               |       |                 |              |             |               |                  |                  |                |                                     |                                |        |
|---------------|-------|-----------------|--------------|-------------|---------------|------------------|------------------|----------------|-------------------------------------|--------------------------------|--------|
|               |       |                 |              |             |               |                  |                  |                | <i>Nectria cinnabarina</i>          | 0.03%                          |        |
|               |       |                 |              |             |               |                  | Nectria          | 0.08%          | <i>Neurospora crassa</i>            | 0.09%                          |        |
|               |       |                 | Microascales | 0.05%       | Microasceae   | 0.05%            | Scedosporium     | 0.05%          | <i>Pestalotiopsis fici</i>          | 0.05%                          |        |
|               |       |                 | Sordariales  | 0.03%       | Chaetomiaceae | 0.02%            | Thermothelomyces | 0.01%          | <i>Scedosporium apiospermum</i>     | 0.01%                          |        |
|               |       |                 |              |             |               |                  | Thielavia        | 0.01%          | <i>Sordaria macrospora</i>          | 0.02%                          |        |
|               |       |                 |              |             | Sordariaceae  | 0.00%            | Neurospora       | 0.00%          | <i>Thermothelomyces thermophila</i> | 0.002%                         |        |
|               |       |                 |              |             |               |                  | Sordaria         | 0.00%          | <i>Thielavia terrestris</i>         | 0.002%                         |        |
|               |       |                 | Xylariales   | 0.48%       | Sporocadaceae | 0.48%            | Pestalotiopsis   | 0.48%          | <i>Trichoderma asperellum</i>       | 0.48%                          |        |
| Basidiomycota | 0.08% | Tremellomycetes | 0.03%        | Agaricales  | 0.03%         | Agaricaceae      | 0.00%            | Agaricus       | 0.00%                               | <i>Cryptococcus neoformans</i> | 0.002% |
|               |       |                 |              |             |               | Marasmiaceae     | 0.00%            | Moniliophthora | 0.00%                               | <i>Cryptococcus gattii</i>     | 0.003% |
|               |       |                 |              |             |               | Tricholomataceae | 0.03%            | Laccaria       | 0.03%                               | <i>Tremella fuciformis</i>     | 0.03%  |
|               |       | Agaricomycetes  | 0.05%        | Tremellales | 0.05%         | Cryptococcaceae  | 0.02%            | Cryptococcus   | 0.02%                               | <i>Agaricus bisporus</i>       | 0.01%  |
|               |       |                 |              |             |               |                  |                  |                | <i>Laccaria bicolor</i>             | 0.02%                          |        |
|               |       |                 |              |             | Tremellaceae  | 0.03%            | Tremella         | 0.03%          | <i>Moniliophthora perniciosa</i>    | 0.03%                          |        |



Table S12. Normalized abundance of detected fungi at the species level.

| Species                              | Week 0 | Week 1   | Week 2 | Week 3  | Week 4 | Week 5 | Week 6 | Week 7 |
|--------------------------------------|--------|----------|--------|---------|--------|--------|--------|--------|
| <i>Candida glabrata</i>              | 4.53   |          |        |         | 3.79   | 11.63  |        |        |
| <i>Agaricus bisporus</i>             |        |          |        |         | 8.73   | 2.99   |        |        |
| <i>Amorphotheca resiniae</i>         |        |          |        |         |        | 3.17   | 5.13   |        |
| <i>Aspergillus fumigatus</i>         |        | 183.48   |        | 170.82  |        |        |        |        |
| <i>Aspergillus nidulans</i>          |        | 169.51   |        |         |        |        |        |        |
| <i>Aspergillus oryzae</i>            | 1.18   | 25.15    | 1.73   | 9.14    | 2.96   | 1.83   | 1.03   | 4.35   |
| <i>Bipolaris cookei</i>              |        |          |        |         |        | 43.02  |        |        |
| <i>Botrytis cinerea</i>              | 4.84   | 2.87     | 2.94   | 2.43    | 2.93   | 2.70   |        |        |
| <i>Candida dubliniensis</i>          |        | 2.48     |        |         | 9.31   |        | 1.78   | 2.36   |
| <i>Chrysosporthe austroafricana</i>  |        | 177.08   |        | 27.48   |        |        |        |        |
| <i>Chrysosporthe deuterocubensis</i> |        |          |        | 42.15   |        |        |        |        |
| <i>Clonostachys rosea</i>            |        | 137.64   |        |         |        |        |        |        |
| <i>Colletotrichum graminicola</i>    |        |          |        | 925.76  |        |        |        |        |
| <i>Cryptococcus gattii</i>           |        |          |        |         |        | 2.94   | 2.45   |        |
| <i>Cryptococcus neoformans</i>       |        | 3.74     |        | 3.75    |        |        |        |        |
| <i>Debaryomyces hansenii</i>         | 3.69   | 7.92     |        | 8.80    | 4.07   |        |        |        |
| <i>Dekkera bruxellensis</i>          |        | 73.67    |        | 68.59   |        |        |        |        |
| <i>Diaporthe longicolla</i>          |        | 18760.22 | 125.00 | 1177.48 | 93.52  | 109.31 |        |        |
| <i>Didymella pinodes</i>             | 178.10 |          |        |         |        |        |        |        |
| <i>Epidermophyton floccosum</i>      |        |          | 216.10 | 169.64  |        |        |        |        |
| <i>Eremothecium gossypii</i>         |        |          |        |         | 5.51   | 3.24   |        |        |
| <i>Eremothecium sinecaudum</i>       |        |          |        |         | 5.48   |        |        |        |
| <i>Exophiala dermatitidis</i>        | 191.68 |          |        |         |        |        |        |        |
| <i>Fusarium circinatum</i>           |        | 587.48   |        | 703.22  |        | 174.09 |        |        |

|                                     |        |        |       |        |        |        |       |        |
|-------------------------------------|--------|--------|-------|--------|--------|--------|-------|--------|
| <i>Fusarium graminearum</i>         |        | 58.87  |       | 438.45 |        |        |       |        |
| <i>Fusarium mangiferae</i>          |        |        |       | 171.20 |        |        |       | 352.62 |
| <i>Gibberella moniliformis</i>      | 92.73  |        |       | 97.55  |        |        |       |        |
| <i>Kazachstania naganishii</i>      |        |        |       | 5.28   | 3.87   |        |       |        |
| <i>Kluyveromyces lactis</i>         |        |        |       |        |        | 3.41   |       |        |
| <i>Kluyveromyces marxianus</i>      |        | 3.71   |       | 3.06   |        |        |       |        |
| <i>Kuraishia capsulata</i>          | 4.41   | 4.99   |       |        | 4.42   |        |       |        |
| <i>Laccaria bicolor</i>             | 4.83   | 9.98   | 3.31  | 4.87   | 2.48   | 7.43   | 4.03  | 9.27   |
| <i>Lachancea thermotolerans</i>     |        |        |       |        | 3.28   | 3.40   |       |        |
| <i>Meyerozyma guilliermondii</i>    |        |        |       |        | 160.86 |        |       |        |
| <i>Moniliophthora perniciosa</i>    |        |        |       | 48.06  |        |        |       |        |
| <i>Mycosphaerella graminicola</i>   | 226.75 |        |       |        |        |        |       |        |
| <i>Nectria cinnabarina</i>          |        | 80.58  |       |        |        |        |       |        |
| <i>Neurospora crassa</i>            |        | 260.59 |       |        |        |        |       |        |
| <i>Penicillium chrysogenum</i>      | 89.75  | 42.56  | 6.87  | 45.95  | 288.28 | 147.93 | 15.96 | 6.87   |
| <i>Pestalotiopsis fici</i>          | 286.75 |        |       |        |        |        |       |        |
| <i>Pithomyces chartarum</i>         | 144.63 |        |       |        |        |        |       |        |
| <i>Ricasolia amplissima</i>         | 60.54  |        |       |        |        |        |       |        |
| <i>Saccharomyces cerevisiae</i>     |        | 6.81   |       |        |        |        |       |        |
| <i>Scedosporium apiospermum</i>     |        |        |       |        |        | 14.31  |       |        |
| <i>Schizosaccharomyces pombe</i>    |        |        |       |        |        |        |       | 2.20   |
| <i>Sordaria macrospora</i>          | 4.85   | 6.41   | 10.35 |        | 2.89   |        | 6.32  | 22.04  |
| <i>Stemphylium lycopersici</i>      |        | 74.19  |       |        |        |        |       |        |
| <i>Sugiyamaella lignohabitans</i>   |        | 4.37   |       | 7.41   | 1.80   |        |       |        |
| <i>Talaromyces marneffeii</i>       |        |        |       | 147.97 |        |        |       | 761.92 |
| <i>Tetrapisispora blattae</i>       | 6.77   |        |       | 1.94   |        |        |       |        |
| <i>Tetrapisispora phaffii</i>       |        | 68.48  | 45.12 | 21.25  | 20.25  | 23.67  | 26.32 | 58.36  |
| <i>Thermothelomyces thermophila</i> | 1.30   | 1.46   | 1.48  | 1.06   | 0.46   | 1.63   | 1.29  | 1.94   |
| <i>Thielavia terrestris</i>         | 1.98   | 1.37   | 1.92  | 1.49   | 1.23   | 2.20   | 1.00  | 0.90   |

|                                 |           |           |          |           |          |           |          |          |
|---------------------------------|-----------|-----------|----------|-----------|----------|-----------|----------|----------|
| <i>Torulaspora delbrueckii</i>  |           |           |          |           |          |           | 4.00     |          |
| <i>Tremella fuciformis</i>      | 142.18    |           |          |           |          |           |          |          |
| <i>Trichoderma asperellum</i>   |           |           |          |           | 166.60   |           |          |          |
| <i>Trichophyton rubrum</i>      |           |           | 247.54   |           |          |           |          |          |
| <i>Usnea ceratina</i>           |           | 85.94     |          |           |          | 89.13     |          |          |
| <i>Wickerhamomyces ciferrii</i> | 539341.10 | 286941.40 | 45174.40 | 174945.06 | 33799.87 | 218599.53 | 50508.57 | 51128.68 |
| <i>Yarrowia lipolytica</i>      | 2.16      | 1.37      |          | 1.44      | 2.17     | 1.61      | 1.49     |          |
| <i>Zymoseptoria tritici</i>     | 1.42      |           |          |           | 1.43     |           |          |          |

---

Table S13. Normalized percent relative abundance of detected fungi at the species level.

| Species                              | Week 0 | Week 1 | Week 2 | Week 3 | Week 4 | Week 5 | Week 6 | Week 7 | Frequency |
|--------------------------------------|--------|--------|--------|--------|--------|--------|--------|--------|-----------|
| <i>Candida glabrata</i>              | 0.0008 |        |        |        | 0.0109 | 0.0053 |        |        | 37.5      |
| <i>Agaricus bisporus</i>             |        |        |        |        | 0.0252 | 0.0014 |        |        | 25        |
| <i>Amorphotheca resiniae</i>         |        |        |        |        |        | 0.0014 | 0.0101 |        | 25        |
| <i>Aspergillus fumigatus</i>         |        | 0.0596 |        | 0.0953 |        |        |        |        | 25        |
| <i>Aspergillus nidulans</i>          |        | 0.0551 |        |        |        |        |        |        | 12.5      |
| <i>Aspergillus oryzae</i>            | 0.0002 | 0.0082 | 0.0038 | 0.0051 | 0.0086 | 0.0008 | 0.0020 | 0.0126 | 87.5      |
| <i>Bipolaris cookei</i>              |        |        |        |        |        | 0.0196 |        |        | 12.5      |
| <i>Botrytis cinerea</i>              | 0.0009 | 0.0009 | 0.0064 | 0.0014 | 0.0085 | 0.0012 |        |        | 75        |
| <i>Candida dubliniensis</i>          |        | 0.0008 |        |        | 0.0269 |        | 0.0035 | 0.0023 | 50        |
| <i>Chrysosporthe austroafricana</i>  |        | 0.0575 |        | 0.0153 |        |        |        |        | 25        |
| <i>Chrysosporthe deuterocubensis</i> |        |        |        | 0.0200 |        |        |        |        | 12.5      |
| <i>Clonostachys rosea</i>            |        | 0.0447 |        |        |        |        |        |        | 12.5      |
| <i>Colletotrichum graminicola</i>    |        |        |        | 0.5165 |        |        |        |        | 12.5      |
| <i>Cryptococcus gattii</i>           |        |        |        |        |        | 0.0013 | 0.0049 |        | 25        |
| <i>Cryptococcus neoformans</i>       |        | 0.0012 |        | 0.0021 |        |        |        |        | 25        |
| <i>Debaryomyces hansenii</i>         | 0.0007 | 0.0026 |        | 0.0049 | 0.0118 |        |        |        | 50        |
| <i>Dekkera bruxellensis</i>          |        | 0.0239 |        | 0.0383 |        |        |        |        | 25        |
| <i>Diaporthe longicolla</i>          |        | 6.0952 | 0.2727 | 0.6569 | 0.2703 | 0.0499 |        |        | 62.5      |
| <i>Didymella pinodes</i>             | 0.0329 |        |        |        |        |        |        |        | 12.5      |
| <i>Epidermophyton floccosum</i>      |        |        | 0.4715 | 0.0946 |        |        |        |        | 25        |
| <i>Eremothecium gossypii</i>         |        |        |        |        | 0.0159 | 0.0015 |        |        | 25        |
| <i>Eremothecium sinicaudum</i>       |        |        |        |        | 0.0158 |        |        |        | 12.5      |
| <i>Exophiala dermatitidis</i>        | 0.0354 |        |        |        |        |        |        |        | 12.5      |
| <i>Fusarium circinatum</i>           |        | 0.1909 |        | 0.3923 |        | 0.0794 |        |        | 37.5      |
| <i>Fusarium graminearum</i>          |        | 0.0191 |        | 0.2446 |        |        |        |        | 25        |

|                                     |        |        |        |        |        |        |        |        |      |
|-------------------------------------|--------|--------|--------|--------|--------|--------|--------|--------|------|
| <i>Fusarium mangiferae</i>          |        |        |        | 0.0955 |        |        |        | 0.3405 | 25   |
| <i>Gibberella moniliformis</i>      | 0.0171 |        |        | 0.0544 |        |        |        |        | 25   |
| <i>Kazachstania naganishii</i>      |        |        |        | 0.0029 | 0.0112 |        |        |        | 25   |
| <i>Kluyveromyces lactis</i>         |        |        |        |        |        | 0.0016 |        |        | 12.5 |
| <i>Kluyveromyces marxianus</i>      |        | 0.0012 |        | 0.0017 |        |        |        |        | 25   |
| <i>Kuraishia capsulata</i>          | 0.0008 | 0.0016 |        |        | 0.0128 |        |        |        | 37.5 |
| <i>Laccaria bicolor</i>             | 0.0009 | 0.0032 | 0.0072 | 0.0027 | 0.0072 | 0.0034 | 0.0080 | 0.0179 | 100  |
| <i>Lachancea thermotolerans</i>     |        |        |        |        | 0.0095 | 0.0015 |        |        | 25   |
| <i>Meyerozyma guilliermondii</i>    |        |        |        |        | 0.4650 |        |        |        | 12.5 |
| <i>Moniliophthora perniciosa</i>    |        |        |        | 0.0268 |        |        |        |        | 12.5 |
| <i>Mycosphaerella graminicola</i>   | 0.0419 |        |        |        |        |        |        |        | 12.5 |
| <i>Nectria cinnabarina</i>          |        | 0.0262 |        |        |        |        |        |        | 12.5 |
| <i>Neurospora crassa</i>            |        | 0.0847 |        |        |        |        |        |        | 12.5 |
| <i>Penicillium chrysogenum</i>      | 0.0166 | 0.0138 | 0.0150 | 0.0256 | 0.8333 | 0.0675 | 0.0315 | 0.0265 | 100  |
| <i>Pestalotiopsis fici</i>          | 0.0530 |        |        |        |        |        |        |        | 12.5 |
| <i>Pithomyces chartarum</i>         | 0.0267 |        |        |        |        |        |        |        | 12.5 |
| <i>Ricasolia amplissima</i>         | 0.0112 |        |        |        |        |        |        |        | 12.5 |
| <i>Saccharomyces cerevisiae</i>     |        | 0.0022 |        |        |        |        |        |        | 12.5 |
| <i>Scedosporium apiospermum</i>     |        |        |        |        |        | 0.0065 |        |        | 12.5 |
| <i>Schizosaccharomyces pombe</i>    |        |        |        |        |        |        |        | 0.0021 | 12.5 |
| <i>Sordaria macrospora</i>          | 0.0009 | 0.0021 | 0.0226 |        | 0.0084 |        | 0.0125 | 0.0426 | 75   |
| <i>Stemphylium lycopersici</i>      |        | 0.0241 |        |        |        |        |        |        | 12.5 |
| <i>Sugiyamaella lignohabitans</i>   |        | 0.0014 |        | 0.0041 | 0.0052 |        |        |        | 37.5 |
| <i>Talaromyces marneffeii</i>       |        |        |        | 0.0825 |        |        |        | 0.7358 | 25   |
| <i>Tetrapisispora blattae</i>       | 0.0013 |        |        | 0.0011 |        |        |        |        | 25   |
| <i>Tetrapisispora phaffii</i>       |        | 0.0222 | 0.0984 | 0.0119 | 0.0585 | 0.0108 | 0.0520 | 0.0564 | 87.5 |
| <i>Thermothelomyces thermophila</i> | 0.0002 | 0.0005 | 0.0032 | 0.0006 | 0.0013 | 0.0007 | 0.0026 | 0.0056 | 75   |
| <i>Thielavia terrestris</i>         | 0.0004 | 0.0004 | 0.0042 | 0.0008 | 0.0035 | 0.0010 | 0.0020 | 0.0026 | 75   |
| <i>Torulasporea delbrueckii</i>     |        |        |        |        |        |        | 0.0079 |        | 12.5 |

|                                 |         |         |         |         |         |         |         |         |      |
|---------------------------------|---------|---------|---------|---------|---------|---------|---------|---------|------|
| <i>Tremella fuciformis</i>      | 0.0263  |         |         |         |         |         |         |         | 12.5 |
| <i>Trichoderma asperellum</i>   |         |         |         |         | 0.4816  |         |         |         | 12.5 |
| <i>Trichophyton rubrum</i>      |         |         | 0.5400  |         |         |         |         |         | 12.5 |
| <i>Usnea ceratina</i>           |         | 0.0279  |         |         |         | 0.0407  |         |         | 12.5 |
| <i>Wickerhamomyces ciferrii</i> | 99.7309 | 93.2272 | 98.5550 | 97.5976 | 97.6982 | 99.7037 | 99.8600 | 98.7550 | 100  |
| <i>Yarrowia lipolytica</i>      | 0.0004  | 0.0004  |         | 0.0008  | 0.0063  | 0.0007  | 0.0029  |         | 50   |
| <i>Zymoseptoria tritici</i>     | 0.0003  |         |         |         | 0.0041  |         |         |         | 12.5 |

---
